# Supplementary material
Source: PubMed Central journal article supplement (PMC4152058)
Supplement: ijcep0007-4971-f4.pdf [file ijcep0007-4971-f4.pdf]

## Manual and automated evaluation of SSTR

**Supplementary Table 1.** Digital analysis of BB1 in correlation to PET/CT- and manually evaluated immunohistochemical scores for patients with DOTA-NOC

| Virtual Score | Manual Score               |                            |                            |                            |
|---------------|----------------------------|----------------------------|----------------------------|----------------------------|
|               | IRS                        | Her2/neu                   | SUVmax (PET/CT data)       | SUVmean (PET/CT data)      |
| BB1 (SSTR1)   | r: 0.42; P = 0.10 N = 16   | r: 0.35; P = 0.18 N = 16   | r: -0.23; P = 0.38 N = 16  | r: -0.20; P = 0.45 N = 16  |
| BB1 (SSTR2A)  | r: 0.47; P = 0.07 N = 16   | r: 0.61; P = 0.012* N = 16 | r: 0.58; P = 0.018* N = 16 | r: 0.52; P = 0.039* N = 16 |
| BB1 (SSTR4)   | r: 0.11; P = 0.66 N = 18   | r: 0.37; P = 0.13 N = 18   | r: -0.05; P = 0.86 N = 18  | r: -0.02; P = 0.95 N = 18  |
| BB1 (SSTR5)   | r: 0.57; P = 0.027* N = 15 | r: 0.55; P = 0.034* N = 15 | r: -0.04; P = 0.89 N = 15  | r: 0.01; P = 0.96 N = 15   |

r: correlation factor. \*: P < 0.05.

**Supplementary Table 2.** Digital analysis of BB1 in correlation to PET/CT- and manually evaluated immunohistochemical scores for patients with DOTA-TATE

| Virtual Score | Manual Score             |                          |                          |                          |
|---------------|--------------------------|--------------------------|--------------------------|--------------------------|
|               | IRS                      | Her2/neu                 | SUVmax (PET/CT data)     | SUVmean (PET/CT data)    |
| BB1 (SSTR1)   | r: 0.06; P = 0.90 N = 8  | r: -0.10; P = 0.82 N = 8 | r: 0.66; P = 0.08 N = 8  | r: 0.66; P = 0.07 N = 8  |
| BB1 (SSTR2A)  | r: 0.19; P = 0.69 N = 7  | r: 0.54; P = 0.22 N = 7  | r: 0.47; P = 0.29 N = 7  | r: 0.36; P = 0.43 N = 7  |
| BB1 (SSTR4)   | r: -0.27; P = 0.56 N = 7 | r: 0.20; P = 0.66 N = 7  | r: 0.23; P = 0.61 N = 7  | r: 0.27; P = 0.56 N = 7  |
| BB1 (SSTR5)   | r: 0.21; P = 0.66 N = 7  | r: 0.21; P = 0.66 N = 7  | r: -0.31; P = 0.50 N = 7 | r: -0.34; P = 0.45 N = 7 |

r: correlation factor.
